# Supplementary material
Source: PubMed Central journal article supplement (PMC2656146)
Supplement: 0900212106_0900212106SI.pdf [file 0900212106_0900212106SI.pdf]

# Supporting Information

Yao *et al.* 10.1073/pnas.0900212106

## SI Materials and Methods

**Plasmids and Reagents.** For expression in enteropathogenic *Escherichia coli* (EPEC), cycle-inhibiting factor (Cif) was cloned into pBluescript II SK(-). For recombinant expression in *E. coli*, Cif homolog in *Burkholderia pseudomallei* (CHBP) was constructed into pGEX-6P (Amersham Biosciences). For transfection in mammalian cells, Cif family members were cloned into pCS2(+) with an N-terminal EGFP tag. Truncation and deletion mutants were constructed by standard PCR cloning strategy, and point mutants were generated by the QuikChange site-directed mutagenesis kit (Stratagene). All of the plasmids were verified by DNA sequencing. Cell culture products were from Invitrogen, and all other chemicals were Sigma-Aldrich products unless noted.

**Protein Purification and Crystallization.** For expression, the BL21 (DE3) strain (Novagen) harboring the CHBP-N48 construct was induced for 8 h at 22 °C in the presence of isopropyl- $\beta$ -thiogalactopyranoside after  $A_{600}$  reached 0.8. The GST fusion protein was purified by glutathione-Sepharose resin, and the GST tag was removed by PreScission protease digestion. The protein was further purified by ion exchange chromatography followed by gel filtration chromatography (Superdex 200; Amersham Biosciences). The SeMet-labeled protein was expressed in the methionine-auxotrophic strain B834 (DE3) (Novagen) (1) and purified the same as that for the native protein. For crystallization, purified CHBP proteins were concentrated to 5 mg/mL in a buffer containing 50 mM Tris-HCl and 0.15 M NaCl (pH 7.9). Crystals of native and SeMet-labeled protein were obtained in 32% PEG 1000, 100 mM sodium cacodylate (pH 6.0), and 5% (vol/vol) glycerol in 7 days by using the hanging-vapor diffusion method at 20 °C.

**Data Collection, Structural Determination, and Refinement.** The anomalous diffraction data (Se-peak) for the SeMet-labeled CHBP crystal were collected at the KEK radiation facility at a wavelength of 0.9791 Å at 95 K and processed with HKL-2000 (2). The structure was determined and autobuilt by the Se-single-wavelength anomalous diffraction phasing method using the program PHENIX (3), which provided a 75% complete model. The remaining residues of the model were manually built with COOT (4). The structure was further refined to 2.1 Å by using native crystal data in PHENIX and Refmac5.0. The quality of both models was checked with PROCHECK program (5). Statistics of data collection and refinement are listed in Table S1. All structural pictures were drawn by using PyMOL (<http://www.delanoscientific.com/>).

**Cell Culture, Transfection, EPEC Infection, and Cell Cycle Analysis.** 293T and HeLa cells obtained from American Type Culture Collection were grown in Dulbecco's modified Eagle's medium (DMEM; HyClone) containing 10% FBS and 2 mM L-glutamine

at 37 °C in a 5% CO<sub>2</sub> incubator. Calcium phosphate precipitation was adopted for transfection of 293T cells. Purified recombinant proteins were delivered into HeLa cells by using Profect-P1 protein delivery reagent (Targeting Systems) according to the manufacturer's instructions. HeLa cells were synchronized at the G<sub>1</sub>/S boundary by double-thymidine block before protein delivery was performed in serum-free medium for 4 h. FBS was added back to 10%, and cells were further cultured for 14 h until the time of assay.

For EPEC infection, a single EPEC colony was inoculated into 0.5 mL of LB and statically cultured overnight at 37 °C. On the day of infection, bacterial cultures were diluted by 1:30 in DMEM and further cultured at 37 °C with 5% CO<sub>2</sub> for 3 h. Infection was carried out by adding the DMEM culture of EPEC directly to HeLa cells with a multiplicity of infection of 200:1, and the infection was usually continued for 1 h at 37 °C in the 5% CO<sub>2</sub> incubator. Cells were then washed three times with PBS and cultured for 18 h in DMEM supplemented with 10% FBS and 200  $\mu$ g/mL gentamicin before cell cycle analysis.

To determine the cell cycle distribution, trypsin-treated HeLa cells were fixed and permealized in cold 70% ethanol followed by propidium iodide (PI) staining. DNA content was measured on Cell Lab Quanta SC flow cytometer (Beckman Coulter). To assay transiently transfected cells, trypsin-treated 293T cells were fixed in 3% formaldehyde and permealized in 70% ethanol. Both the PI signal for DNA content and EGFP signal were monitored simultaneously on the flow cytometer, and EGFP-positive cells were gated out and analyzed for PI signal.

**E-64 Labeling and Mass Spectrometry Analysis.** Twelve micrograms of Cif or CHBP-N48 protein was incubated overnight at 30 °C in a buffer containing 25 mM Tris-HCl (pH 7.6), 150 mM NaCl, and 4 mM DTT, with or without 400  $\mu$ M E-64. Reactions were stopped by adding SDS loading buffer and subjected to SDS/PAGE. For mass spectrometry analysis, protein gel bands were destained with 25 mM NH<sub>4</sub>HCO<sub>3</sub> and 50% methanol and reduced in 10 mM DTT for 40 min at 56 °C followed by alkylation in 55 mM iodoacetamide for 1 h in the dark at 20 °C. Proteins were then in-gel-digested with 10 ng/ $\mu$ L sequencing-grade modified trypsin (Promega) in 50 mM NH<sub>4</sub>HCO<sub>3</sub> (pH 7.8) at 37 °C overnight. The resulting tryptic peptides were extracted and analyzed on a LTQ mass spectrometer (Thermo; Fisher Scientific) by nano-HPLC/MS/MS in the data-dependent mode (MS scan mass range was from 350 to 2,000 Da, and the top three most abundant precursor ions from each MS scan were selected for MS/MS scans). The proteins were identified through database searches performed on an in-house Mascot server (version 2.2, Matrix Science). The mass tolerance was 2 Da for precursor ions and 0.5 Da for MS/MS scans. The following variable modifications were chosen for database search: cysteine carbamidomethylation, E-64 labeling of cysteine, and methionine oxidation.

1. Studts JM, Fox BG (1999) Application of fed-batch fermentation to the preparation of isotopically labeled or selenomethionyl-labeled proteins. *Protein Expr Purif* 16:109–119.
2. Otwinowski Z, Minor W (1997) Processing of X-ray diffraction data collected in oscillation mode. *Methods Enzymol* 276:307–326.
3. Adams PD, *et al.* (2002) PHENIX: Building new software for automated crystallographic structure determination. *Acta Crystallogr D* 58:1948–1954.

4. Emsley P, Cowtan K (2004) COOT: Model-building tools for molecular graphics. *Acta Crystallogr D* 60:2126–2132.
5. Laskowski AR, MacArthur WM, Moss SD, Thornton MJ (1993) PROCHECK: A program to check the stereochemical quality of protein structures. *J Appl Crystallogr* 1993:283–291.

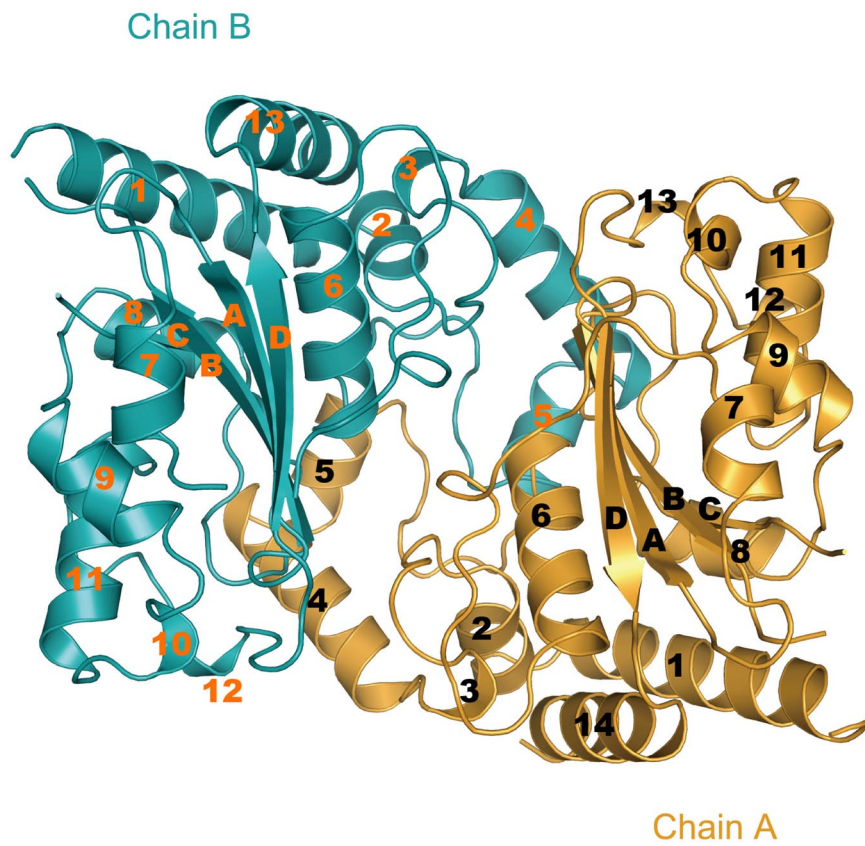

**Fig. S1.** Diagram of the overall structure of CHBP dimer in one asymmetric unit. Chain A is shown in orange and chain B is in blue. Secondary structures are numbered the same as shown in Fig. 2.

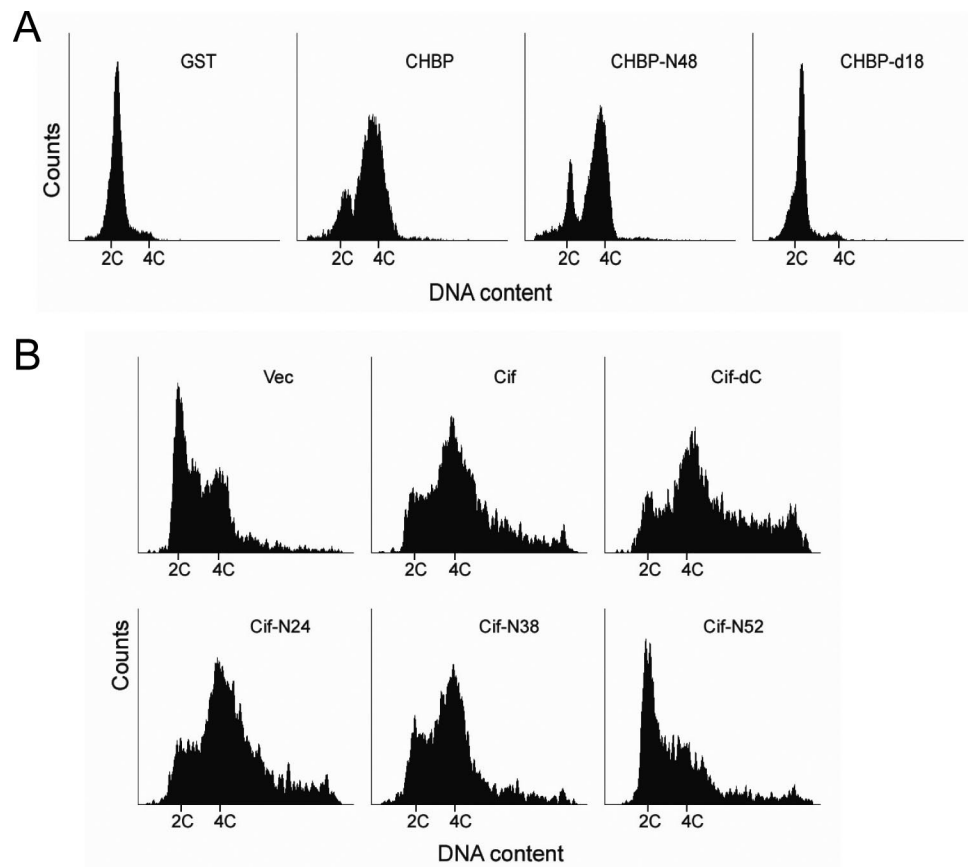

**Fig. S2.** Effects of truncation and deletion mutations of Cif family members on host cell cycle distribution. (A) Effects of CHBP-N48 and CHBP-d18 (deletion of residues 122–139 of CHBP). Purified proteins as indicated were delivered into G<sub>1</sub>/S synchronized HeLa cells, and the cell cycle distribution of cells was examined by flow cytometry analysis as shown. (B) Cell cycle arrest activity of N-terminal truncation mutants of Cif. DNA contents of 293T cells transfected with indicated Cif constructs were measured. Cif-dC, the natural C-terminal truncation of Cif; Cif-N24, Cif-N38, and Cif-N52, truncations of the N-terminal 23, 37, and 51 residues of Cif, respectively.

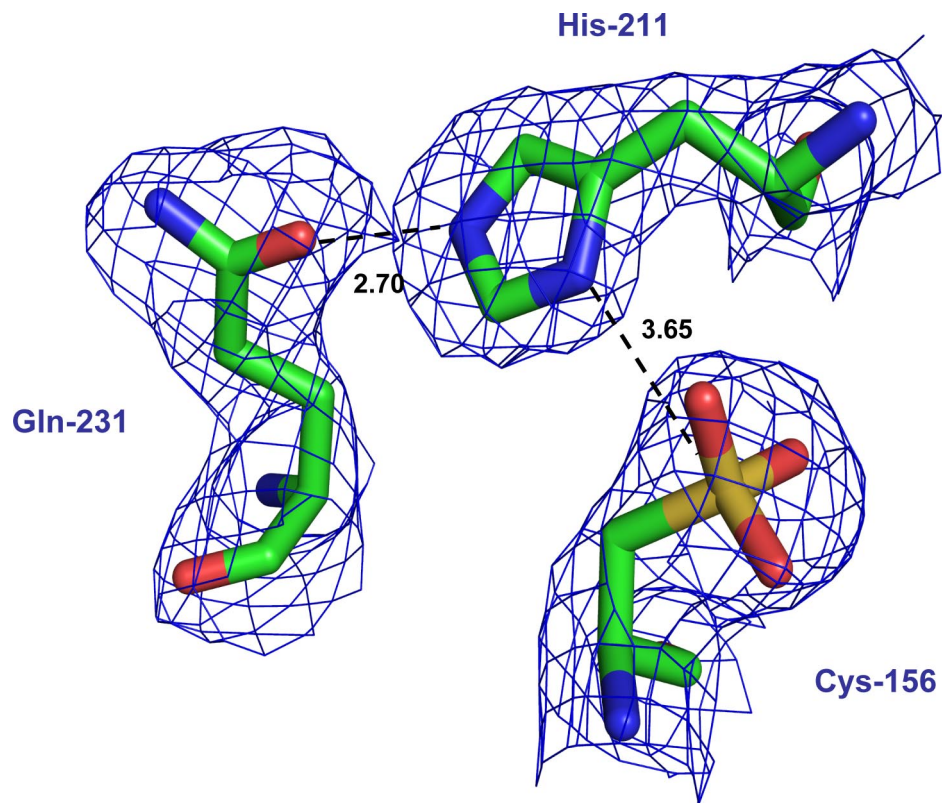

**Fig. S3.** Electron density map of the putative catalytic residues of CHBP. The oxidized Cys-156, His-211, and Gln-231 are shown in stick representation with  $\sigma_A$ -weighted  $2F_o - F_c$  omit electron density map contoured at  $1.0\sigma$ .

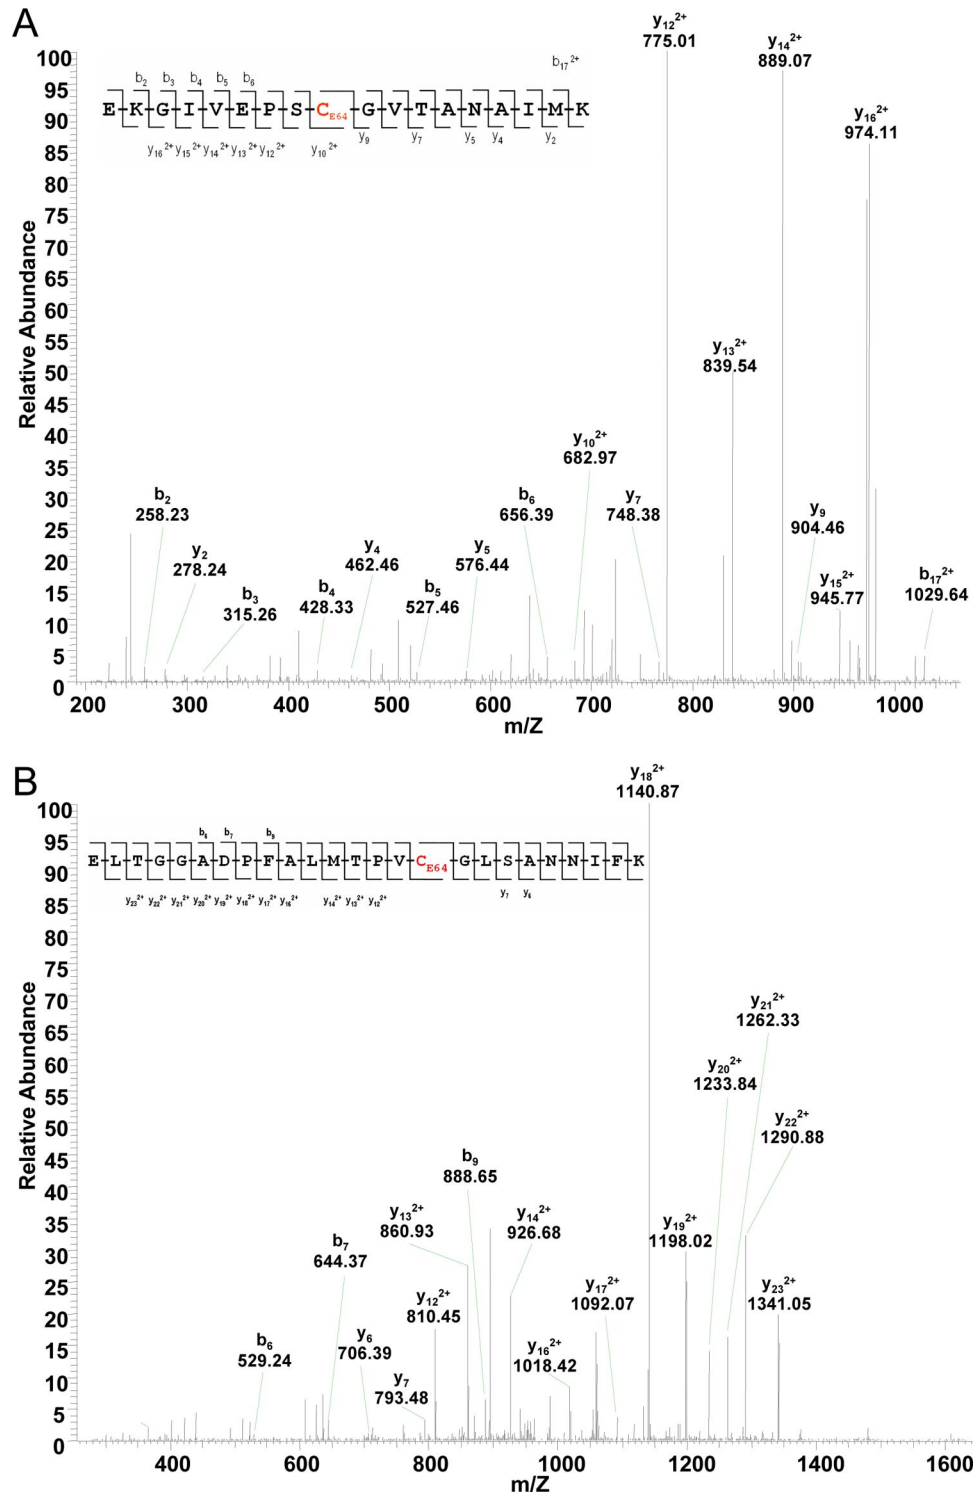

**Fig. S4.** Mass spectrometry spectra of tryptic peptides of Cif (A) and CHBP (B) containing E-64-modified cysteine. b and y ions are marked in the spectra. The amino acid sequence of the peptide is shown at *Upper Left* with the modified Cys highlighted in red. The fragmentation patterns that generate the observed b and y ions are illustrated along the peptide sequence.

**Table S1. Crystallographic data**

| Crystal                                                              | SeMet                                         | Native                                        |
|----------------------------------------------------------------------|-----------------------------------------------|-----------------------------------------------|
| Data collection statistics                                           |                                               |                                               |
| Space group                                                          | P2 <sub>1</sub> 2 <sub>1</sub> 2 <sub>1</sub> | P2 <sub>1</sub> 2 <sub>1</sub> 2 <sub>1</sub> |
| Wavelength                                                           | 0.9791                                        | 1.000                                         |
| <i>a</i> , <i>b</i> , <i>c</i> , Å                                   | 54.34, 78.00, 115.04                          | 54.78, 79.92, 117.42                          |
| Resolution range, Å*                                                 | 50–2.56 (2.65–2.56)                           | 50.0–2.10 (2.18–2.10)                         |
| No. of unique reflections                                            | 16,544 (1,306)                                | 30,618 (2,990)                                |
| Completeness, %                                                      | 97.9% (78.4%)                                 | 99.5% (99.4%)                                 |
| Redundancy                                                           | 13.7 (11.2)                                   | 6.8 (6.5)                                     |
| $\langle I/\sigma(I) \rangle$                                        | 13.9 (7.1)                                    | 18.5 (5.2)                                    |
| <i>R</i> <sub>merge</sub> , %                                        | 8.8 (30.1)                                    | 6.0 (31.8)                                    |
| Refinement statistics                                                |                                               |                                               |
| <i>R</i> <sub>work</sub> / <i>R</i> <sub>free</sub> , % <sup>†</sup> | 20.3/26.7                                     | 19.3/25.4                                     |
| No. of protein atoms                                                 | 3,857                                         | 3,868                                         |
| No. of water atoms                                                   | 70                                            | 260                                           |
| Bond length, Å                                                       | 0.008                                         | 0.006                                         |
| Bond angles, °                                                       | 1.11                                          | 0.94                                          |
| Ramachandran plot statistics                                         |                                               |                                               |
| Most favored regions, %                                              | 98.12                                         | 97.92                                         |
| Additional allowed regions, %                                        | 1.88                                          | 2.08                                          |

\*The data for the highest resolution shell are shown in parentheses.

<sup>†</sup>*R*<sub>free</sub> is calculated using 10% of the total number of reflections.

Table S2. Energy terms of dipeptide docking

| Dipeptide       | Score   | Dipeptide      | Score   |
|-----------------|---------|----------------|---------|
| <b>ARG-ASN</b>  | -39.589 | THR-GLN        | -16.172 |
| ASN- <b>ARG</b> | -39.489 | THR-SER        | -16.126 |
| <b>ARG-GLY</b>  | -37.087 | ASN-LYS        | -16.095 |
| <b>MET-ARG</b>  | -35.345 | ILE-GLN        | -16.087 |
| <b>SER-ARG</b>  | -35.284 | ALA-GLN        | -16.039 |
| <b>GLY-ARG</b>  | -34.954 | <b>ARG-GLN</b> | -15.259 |
| <b>ARG-THR</b>  | -34.491 | GLY-SER        | -15.145 |
| ALA- <b>ARG</b> | -33.958 | TYR-TRP        | -14.976 |
| <b>ARG-ILE</b>  | -33.874 | SER-THR        | -14.974 |
| <b>VAL-ARG</b>  | -32.973 | ALA-CYS        | -14.208 |
| <b>ILE-ARG</b>  | -32.74  | MET-CYS        | -14.168 |
| <b>CYS-ARG</b>  | -32.739 | SER-GLY        | -14.158 |
| <b>THR-ARG</b>  | -32.096 | CYS-SER        | -14.145 |
| <b>ASP-ARG</b>  | -32.046 | THR-MET        | -14.063 |
| <b>ARG-SER</b>  | -29.911 | GLN-LYS        | -14.005 |
| <b>ARG-ALA</b>  | -29.354 | MET-SER        | -13.909 |
| <b>LEU-ARG</b>  | -29.135 | THR-ALA        | -13.823 |
| <b>ARG-VAL</b>  | -28.396 | VAL-SER        | -13.761 |
| ASN-GLY         | -26.825 | THR-GLY        | -13.705 |
| GLN-ASN         | -26.146 | GLY-CYS        | -13.508 |
| <b>ARG-LEU</b>  | -25.306 | SER-VAL        | -12.679 |
| LEU-ASN         | -24.851 | Dipeptide      | Score   |
| GLY-ASN         | -23.512 | SER-ILE        | -12.588 |
| ASN-ASN         | -23.493 | ALA-SER        | -12.522 |
| <b>ARG-CYS</b>  | -23.19  | <b>ARG-GLU</b> | -12.411 |
| ASN-GLN         | -23.185 | ASN-LEU        | -12.314 |
| <b>GLU-ARG</b>  | -23.147 | LEU-SER        | -12.299 |
| GLN-GLN         | -22.724 | LYS-GLN        | -12.228 |
| ASN-THR         | -21.822 | SER-MET        | -12.196 |
| CYS-ASN         | -21.771 | LEU-CYS        | -12.122 |
| <b>GLN-ARG</b>  | -21.703 | VAL-CYS        | -12.092 |
| VAL-ASN         | -21.476 | SER-CYS        | -12.047 |
| MET-ASN         | -21.472 | ILE-CYS        | -11.949 |
| GLN-GLY         | -21.469 | THR-CYS        | -11.637 |
| ASN-SER         | -21.389 | THR-LEU        | -11.583 |
| LEU-GLN         | -21.05  | THR-THR        | -11.431 |
| ILE-ASN         | -20.87  | LYS-SER        | -11.181 |
| SER-SER         | -19.362 | THR-VAL        | -10.864 |
| ASN-VAL         | -19.314 | TYR-VAL        | -10.855 |
| SER-GLN         | -19.085 | CYS-THR        | -10.308 |
| GLN-MET         | -19.018 | SER-LEU        | -10.022 |
| ASN-ILE         | -18.763 | TYR-GLN        | -9.795  |
| Dipeptide       | Score   | ASN-PHE        | -9.622  |
| GLN-VAL         | -18.718 | LYS-CYS        | -9.534  |
| GLN-LEU         | -18.436 | LEU-THR        | -9.482  |
| GLY-GLN         | -18.431 | SER-ALA        | -9.289  |
| ASN-MET         | -18.37  | CYS-ALA        | -9.219  |
| GLN-CYS         | -18.127 | PHE-TYR        | -9.142  |
| GLN-ALA         | -18.06  | PHE-GLN        | -9.085  |
| THR-ASN         | -17.901 | VAL-THR        | -9.085  |
| LYS-ASN         | -17.783 | TYR-CYS        | -8.958  |
| CYS-GLN         | -17.587 | GLN-PRO        | -8.444  |
| CYS-CYS         | -17.581 | LEU-GLY        | -8.417  |
| GLN-ILE         | -17.464 | ALA-LEU        | -8.348  |
| ASN-ALA         | -17.386 | ILE-SER        | -8.283  |
| ALA-ASN         | -17.37  | MET-ILE        | -8.283  |
| CYS-GLY         | -17.338 | SER-LYS        | -8.186  |
| GLN-THR         | -17.249 | THR-ILE        | -8.019  |
| GLN-SER         | -17.135 | TRP-TYR        | -8.019  |
| MET-GLN         | -17.125 | PRO-GLN        | -7.896  |
| ASN-CYS         | -17.124 | ILE-THR        | -7.731  |
| SER-ASN         | -17.018 | GLY-THR        | -7.6    |
| ASP-GLN         | -16.642 | ALA-THR        | -7.387  |
| VAL-GLN         | -16.429 | MET-THR        | -7.337  |
|                 |         | Dipeptide      | Score   |

| Dipeptide       | Score  | Dipeptide       | Score  |
|-----------------|--------|-----------------|--------|
| TRP-GLY         | -7.184 | GLN-PHE         | -2.391 |
| CYS-VAL         | -7.067 | VAL-VAL         | -2.36  |
| PRO-ASN         | -6.994 | GLY-LEU         | -2.252 |
| PRO-PHE         | -6.76  | TRP-VAL         | -2.211 |
| GLY-GLY         | -6.759 | TYR-LEU         | -2.204 |
| ALA-GLY         | -6.684 | PRO-TRP         | -2.189 |
| GLY-ALA         | -6.667 | GLU-LYS         | -2.14  |
| CYS-ILE         | -6.635 | TYR-ASN         | -2.111 |
| LEU-MET         | -6.496 | PHE-LEU         | -2.099 |
| ASN-TRP         | -6.326 | ASP-ILE         | -2.034 |
| ALA-ILE         | -6.274 | GLU-CYS         | -1.88  |
| ALA-PHE         | -6.056 | PHE-PRO         | -1.874 |
| VAL-GLY         | -6.044 | MET-VAL         | -1.858 |
| GLY-VAL         | -5.994 | HIS-PHE         | -1.849 |
| TRP-SER         | -5.95  | ASP-LEU         | -1.801 |
| ASP-THR         | -5.936 | LEU-TRP         | -1.777 |
| ASP-SER         | -5.93  | ALA-PRO         | -1.772 |
| <b>ARG-ASP</b>  | -5.837 | LEU-LEU         | -1.767 |
| LYS-THR         | -5.826 | SER-PHE         | -1.587 |
| ALA-MET         | -5.712 | GLY-ILE         | -1.586 |
| CYS-LEU         | -5.655 | <b>ARG-MET</b>  | -1.422 |
| PHE-CYS         | -5.593 | ALA-TRP         | -1.407 |
| ASP-TRP         | -5.525 | TYR- <b>ARG</b> | -0.994 |
| CYS-MET         | -5.463 | SER-PRO         | -0.957 |
| GLY-TRP         | -5.257 | ASN-PRO         | -0.926 |
| PHE- <b>ARG</b> | -5.252 | PRO-PRO         | -0.868 |
| MET-GLY         | -5.106 | MET-PRO         | -0.814 |
| VAL-LEU         | -5.059 | TRP-PHE         | -0.78  |
| ALA-VAL         | -5.047 | LEU-PHE         | -0.776 |
| TYR-MET         | -4.988 | PHE-MET         | -0.688 |
| MET-PHE         | -4.828 | PRO-CYS         | -0.654 |
| <b>ARG-TYR</b>  | -4.693 | PHE-HIS         | -0.637 |
| CYS-PRO         | -4.603 | ASP-ASP         | -0.511 |
| ILE-GLY         | -4.552 | ILE-PHE         | -0.49  |
| ILE-MET         | -4.43  | ILE-LYS         | -0.432 |
| VAL-MET         | -4.413 | PRO-ALA         | -0.404 |
| GLY-MET         | -4.408 | LEU-ASP         | -0.366 |
| CYS-PHE         | -4.335 | ASP-MET         | -0.311 |
| LEU-ALA         | -4.324 | GLU-SER         | -0.198 |
| MET-ALA         | -4.25  | TRP-ALA         | -0.028 |
| PHE-PHE         | -4.219 | PRO-ILE         | 0.05   |
| ASP-ASN         | -4.217 | LYS-ALA         | 0.153  |
| PHE-ILE         | -4.216 | ALA-LYS         | 0.176  |
| THR-LYS         | -4.132 | GLU-THR         | 0.401  |
| SER-TRP         | -3.971 | PRO-TYR         | 0.424  |
| ALA-ALA         | -3.927 | LEU-ILE         | 0.446  |
| ILE-ILE         | -3.827 | GLY-LYS         | 0.466  |
| PHE-TRP         | -3.728 | ILE-TRP         | 0.546  |
| MET-MET         | -3.698 | LYS-GLY         | 0.568  |
| VAL-ALA         | -3.511 | PRO-THR         | 0.875  |
| ASP-CYS         | -3.491 | CYS-GLU         | 0.924  |
| VAL-ILE         | -3.487 | CYS-ASP         | 0.939  |
| ILE-ALA         | -3.459 | ASP-VAL         | 0.954  |
| ILE-LEU         | -3.448 | ASP-LYS         | 0.999  |
| MET-LEU         | -3.24  | VAL-LYS         | 1.092  |
| ILE-TYR         | -3.153 | VAL-TRP         | 1.13   |
| ILE-VAL         | -3.097 | TYR-GLY         | 1.16   |
| LEU-VAL         | -2.94  | ASN-GLU         | 1.265  |
| TYR-PHE         | -2.929 | GLY-PRO         | 1.316  |
| GLN-GLU         | -2.908 | VAL-ASP         | 1.368  |
| GLU-ASN         | -2.887 | ASP-PRO         | 1.437  |
| PRO-GLY         | -2.883 | VAL-PRO         | 1.451  |
| GLU-GLN         | -2.756 | THR-GLU         | 1.467  |
| PRO-MET         | -2.561 | GLN-ASP         | 1.48   |
| PHE-ASN         | -2.488 | <b>ARG-PRO</b>  | 1.574  |



| Dipeptide       | Score  | Dipeptide | Score  |
|-----------------|--------|-----------|--------|
| LEU-LYS         | 1.815  | PRO-LYS   | 12.765 |
| ILE-PRO         | 2.072  | PHE-GLU   | 13.225 |
| MET-TRP         | 2.328  | GLU-ASP   | 14.108 |
| SER-GLU         | 2.407  | ASP-TYR   | 14.773 |
| PRO-LEU         | 2.439  | LYS-ASP   | 14.992 |
| PRO-VAL         | 2.452  | LYS-GLU   | 16.133 |
| SER-ASP         | 2.465  | ASP-PHE   | 17.445 |
| ASP-ALA         | 2.51   | PRO-ASP   | 18.051 |
| MET-ASP         | 2.638  | PRO-GLU   | 18.363 |
| PHE-LYS         | 2.866  | TYR-ILE   | 19.07  |
| SER-TYR         | 3.204  | TYR-GLU   | 20.391 |
| HIS-PRO         | 3.313  | GLU-TYR   | 22.169 |
| THR-PRO         | 3.321  | GLU-PRO   | 22.402 |
| CYS-LYS         | 3.345  |           |        |
| GLU-GLY         | 3.453  |           |        |
| ASN-ASP         | 3.488  |           |        |
| LYS-LEU         | 3.73   |           |        |
| TRP-CYS         | 3.751  |           |        |
| TYR-ALA         | 3.789  |           |        |
| THR-ASP         | 3.804  |           |        |
| PRO-SER         | 3.9    |           |        |
| ASN-TYR         | 3.97   |           |        |
| ASP-GLY         | 4.614  |           |        |
| MET-LYS         | 4.748  |           |        |
| LYS-PRO         | 4.792  |           |        |
| PHE-GLY         | 4.792  |           |        |
| ILE-GLU         | 5.151  |           |        |
| TRP-PRO         | 5.338  |           |        |
| LYS-ILE         | 5.385  |           |        |
| GLY-ASP         | 5.422  |           |        |
| PHE-ASP         | 5.467  |           |        |
| TRP-LEU         | 5.697  |           |        |
| LYS-VAL         | 5.701  |           |        |
| GLY-PHE         | 5.779  |           |        |
| GLU-ALA         | 6.059  |           |        |
| PHE-THR         | 6.265  |           |        |
| ALA-ASP         | 6.282  |           |        |
| TYR-ASP         | 6.312  |           |        |
| VAL-PHE         | 6.318  |           |        |
| ASP-GLU         | 6.418  |           |        |
| LYS-MET         | 6.491  |           |        |
| MET-GLU         | 6.496  |           |        |
| ILE-ASP         | 6.505  |           |        |
| LEU-PRO         | 6.566  |           |        |
| VAL-GLU         | 7.002  |           |        |
| PHE-SER         | 7.005  |           |        |
| TRP-ASP         | 7.34   |           |        |
| TRP-ILE         | 7.573  |           |        |
| VAL-TYR         | 7.77   |           |        |
| GLY-GLU         | 8.135  |           |        |
| LYS-LYS         | 8.29   |           |        |
| GLU-VAL         | 8.295  |           |        |
| THR-PHE         | 8.552  |           |        |
| GLU-PHE         | 8.737  |           |        |
| GLU-LEU         | 8.75   |           |        |
| GLY-TYR         | 9.016  |           |        |
| ALA-TYR         | 9.304  |           |        |
| GLU-MET         | 9.469  |           |        |
| GLU-ILE         | 9.483  |           |        |
| <b>ARG-LYS</b>  | 9.741  |           |        |
| LEU-GLU         | 10.013 |           |        |
| LYS- <b>ARG</b> | 10.025 |           |        |
| ALA-GLU         | 10.094 |           |        |
| PHE-VAL         | 12.248 |           |        |
| GLU-GLU         | 12.688 |           |        |

Left column, dipeptide sequence; right column, energy score of docked dipeptide/CHBP complex. The table includes all the 314 dipeptides, for which binding complex can be generated. Arginine and lysine residues are shown in bold and italics, respectively.
